# Supplementary material for: Meta-Analysis of Hypoxic Transcriptomes from Public Databases
Source: MDPI journal article supplement (doi:10.3390/biomedicines8010010), 2020-01-09
Supplement: s1 [file s1]

Supplementary Materials:

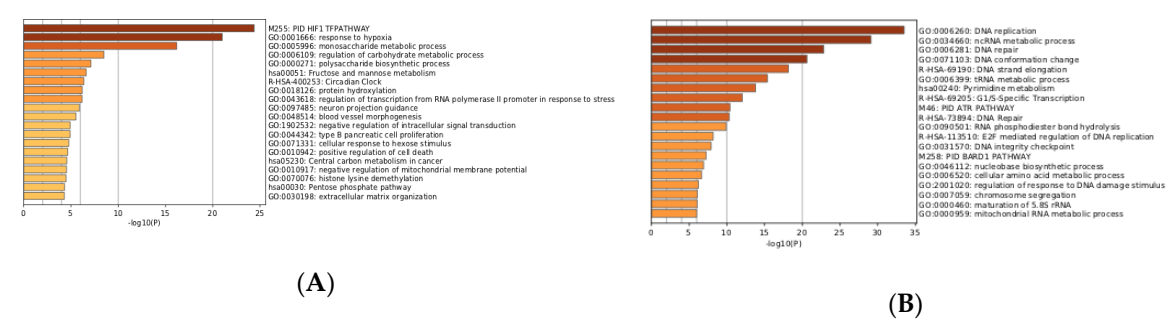

Figure S1: Gene set enrichment analysis of genes up- and downregulated in hypoxic transcriptomes. (A) Gene set enrichment analysis of genes with HN-score  $\Rightarrow$  32; 374 genes (around 1% of all genes). (B) Gene set enrichment analysis of genes with HN-score  $\Leftarrow$  -34; 324 genes (around 1% of all genes)
